# Supplementary material for: Association between early working life patterns, in publicly and privately owned companies, and the course of future sickness absence due to mental disorders: a cohort study in Catalonia (Spain)
Source: PubMed Central journal article supplement — BMJ Open. 2021 Feb 16;11(2):e040480. doi: 10.1136/bmjopen-2020-040480 (PMC7888331; doi:10.1136/bmjopen-2020-040480), 2021-02-16

Table 1 Sample distribution of salaried workers living in Catalonia (2002-2014) and their SA episodes due to mental disorders (2012-2014), according to employment related characteristics.

| Age in 2002 (mean (SD))              | Women (N=879) |               |               | Men (N=500) |               |               |
|--------------------------------------|---------------|---------------|---------------|-------------|---------------|---------------|
|                                      | 23.2 (3.0)    |               |               | 23.1 (3.0)  |               |               |
| 2002-2011                            | N (%)         | Episodes* (%) | MD (P25; P75) | N (%)       | Episodes* (%) | MD (P25; P75) |
| <b>Company size</b>                  |               |               |               |             |               |               |
| Small-medium ( $\leq 100$ workers)   | 576 (65.5)    | 694 (65.2)    | 26 (9;72.5)   | 367 (73.4)  | 442 (70.4)    | 22 (9;55)     |
| Big (>100 workers)                   | 303 (34.5)    | 370 (34.8)    | 18 (8;58)     | 133 (26.6)  | 186 (29.6)    | 21 (6;58)     |
| <b>Company ownership</b>             |               |               |               |             |               |               |
| Private                              | 738 (84.0)    | 892 (83.8)    | 22 (8; 64)    | 449 (89.8)  | 449 (71.5)    | 22 (8;54)     |
| Public                               | 100 (11.4)    | 125 (11.7)    | 29 (10.5; 76) | 32 (6.4)    | 39 (6.2)      | 35.5 (6;75.5) |
| <b>2012-2014</b>                     |               |               |               |             |               |               |
| <b>Working time</b> (%weekly hours)  |               |               |               |             |               |               |
| Full-time (>87.5%)                   | 748 (85.1)    | 902 (84.8)    | 24 (9; 66.5)  | 476 (95.2)  | 595 (94.7)    | 22 (8;57.5)   |
| Part-time (50%-87.5%)                | 116 (13.2)    | 145 (13.6)    | 18 (8;45)     | 21 (4.2)    | 29 (4.6)      | 16 (6;50)     |
| Short part-time (37.5%-49%)          | 5 (0.6)       | 7 (0.7)       | 75 (24;103)   | 1 (0.2)     | 2 (0.3)       | 11 (11;11)    |
| Marginal part-time ( $\leq 37.5\%$ ) | 10 (1.1)      | 10 (0.9)      | 17.5 (10;43)  | 2 (0.4)     | 2 (0.3)       | 120 (46;194)  |
| <b>Occupational category</b>         |               |               |               |             |               |               |
| Non-manual skilled                   | 160 (18.2)    | 189 (17.8)    | 23 (10; 66.5) | 50 (10)     | 61 (9.7)      | 23 (11;67)    |
| Non-manual non-skilled               | 503 (57.2)    | 616 (57.9)    | 24 (9; 67)    | 150 (30)    | 178 (28.3)    | 16 (6;50)     |
| Manual skilled                       | 137 (15.6)    | 161 (15.1)    | 22 (7; 58)    | 217 (43.4)  | 277 (44.1)    | 21 (9;61)     |
| Manual non-skilled                   | 79 (9.0)      | 98 (9.2)      | 24 (8; 56)    | 83 (16.6)   | 112 (17.8)    | 28 (7;61)     |
| <b>Income in tertiles</b>            |               |               |               |             |               |               |
| High                                 | 268 (30.5)    | 327 (30.7)    | 23 (8; 63)    | 191 (38.2)  | 244 (38.9)    | 19 (8;60)     |
| Medium                               | 282 (32.1)    | 328 (30.8)    | 27 (10; 78)   | 177 (35.4)  | 215 (34.2)    | 15 (6;46)     |
| Low                                  | 328 (37.4)    | 407 (38.3)    | 21.5 (8;59)   | 132 (26.4)  | 169 (26.9)    | 37 (13.5;82)  |
| <b>Type of contract</b>              |               |               |               |             |               |               |
| Permanent contract                   | 701 (79.8)    | 837 (78.7)    | 23 (9; 67)    | 418 (83.6)  | 523 (83.3)    | 21 (8;58)     |
| Temporary contract                   | 178 (20.3)    | 227 (21.3)    | 26 (8.5; 61)  | 82 (16.4)   | 105 (16.7)    | 28 (7;55)     |
| <b>Total</b>                         | <b>879</b>    | <b>1.064</b>  |               | <b>500</b>  | <b>628</b>    |               |

\* Sickness absence closed episodes due to mental disorders regardless of its duration between 2012-2014; SD, standard deviation; MD, median duration; P25, percentile 25; P75, percentile 75

Figure 1 Sickness absence trajectories in salaried women living in Catalonia (2012-2014).

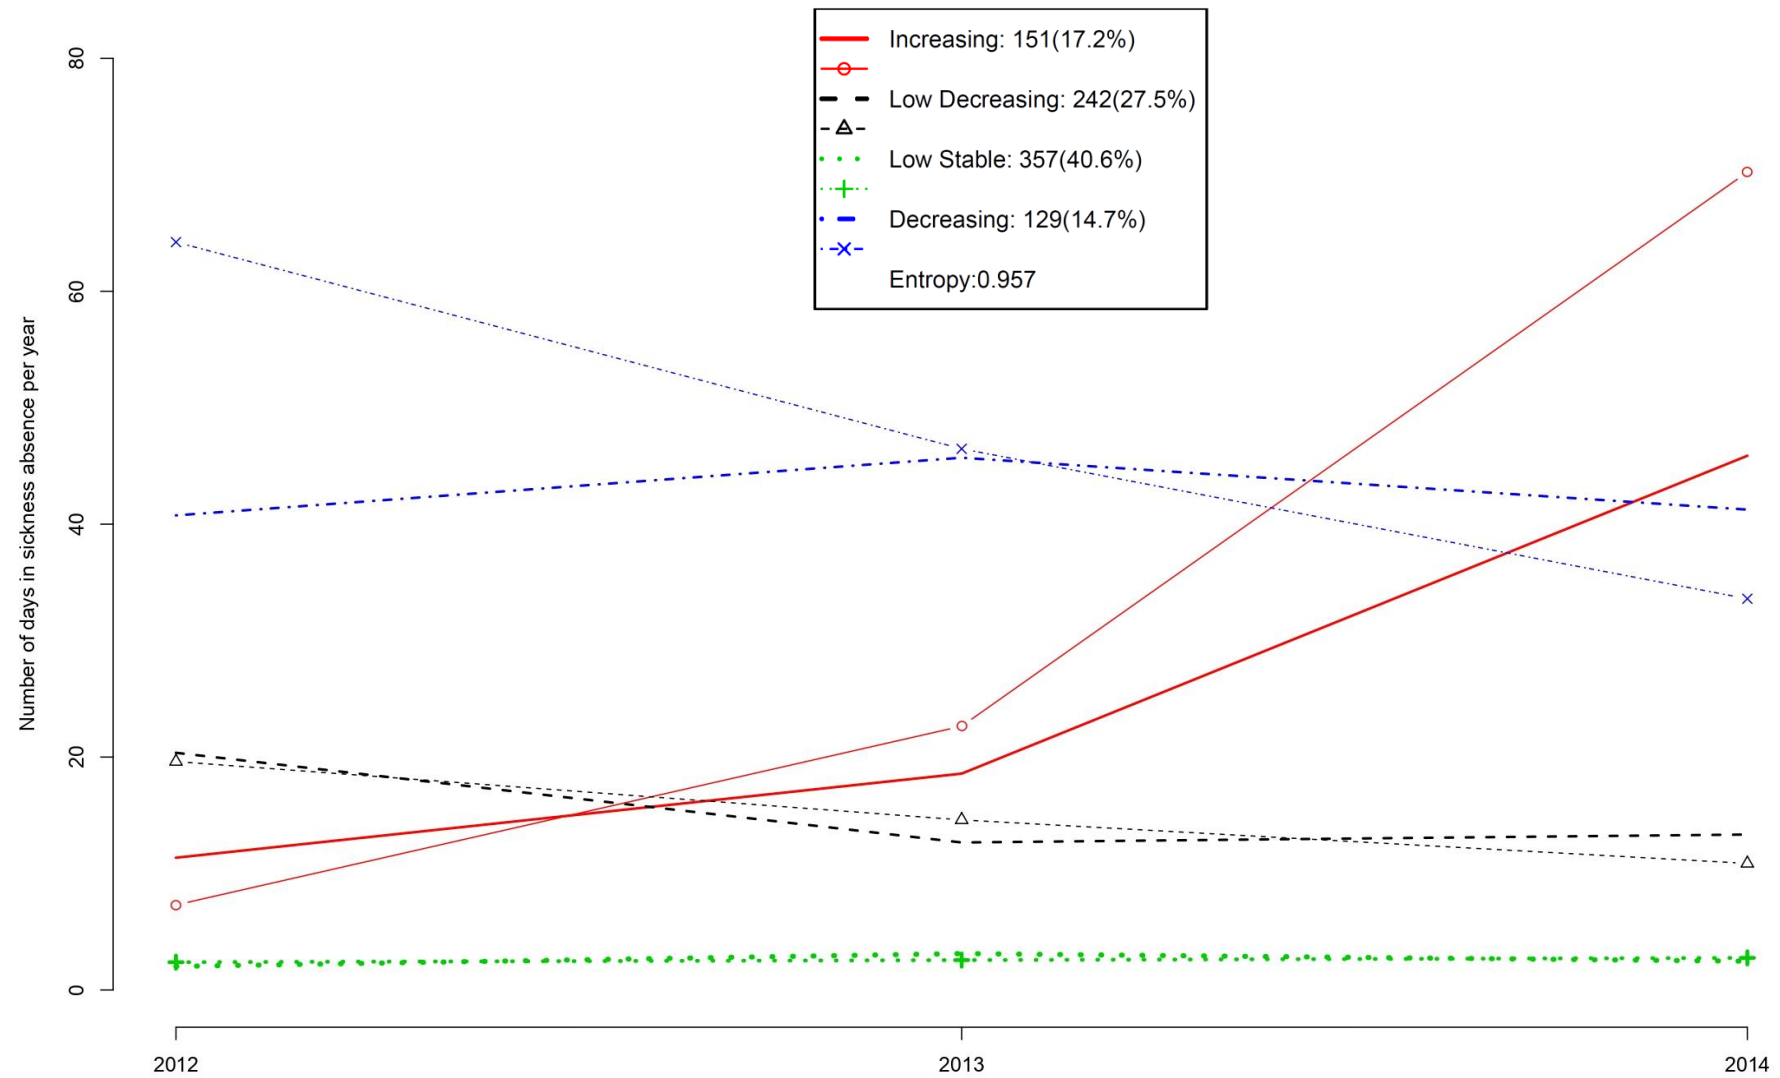

Figure 2 Sickness absence trajectories in salaried men living in Catalonia (2012-2014).

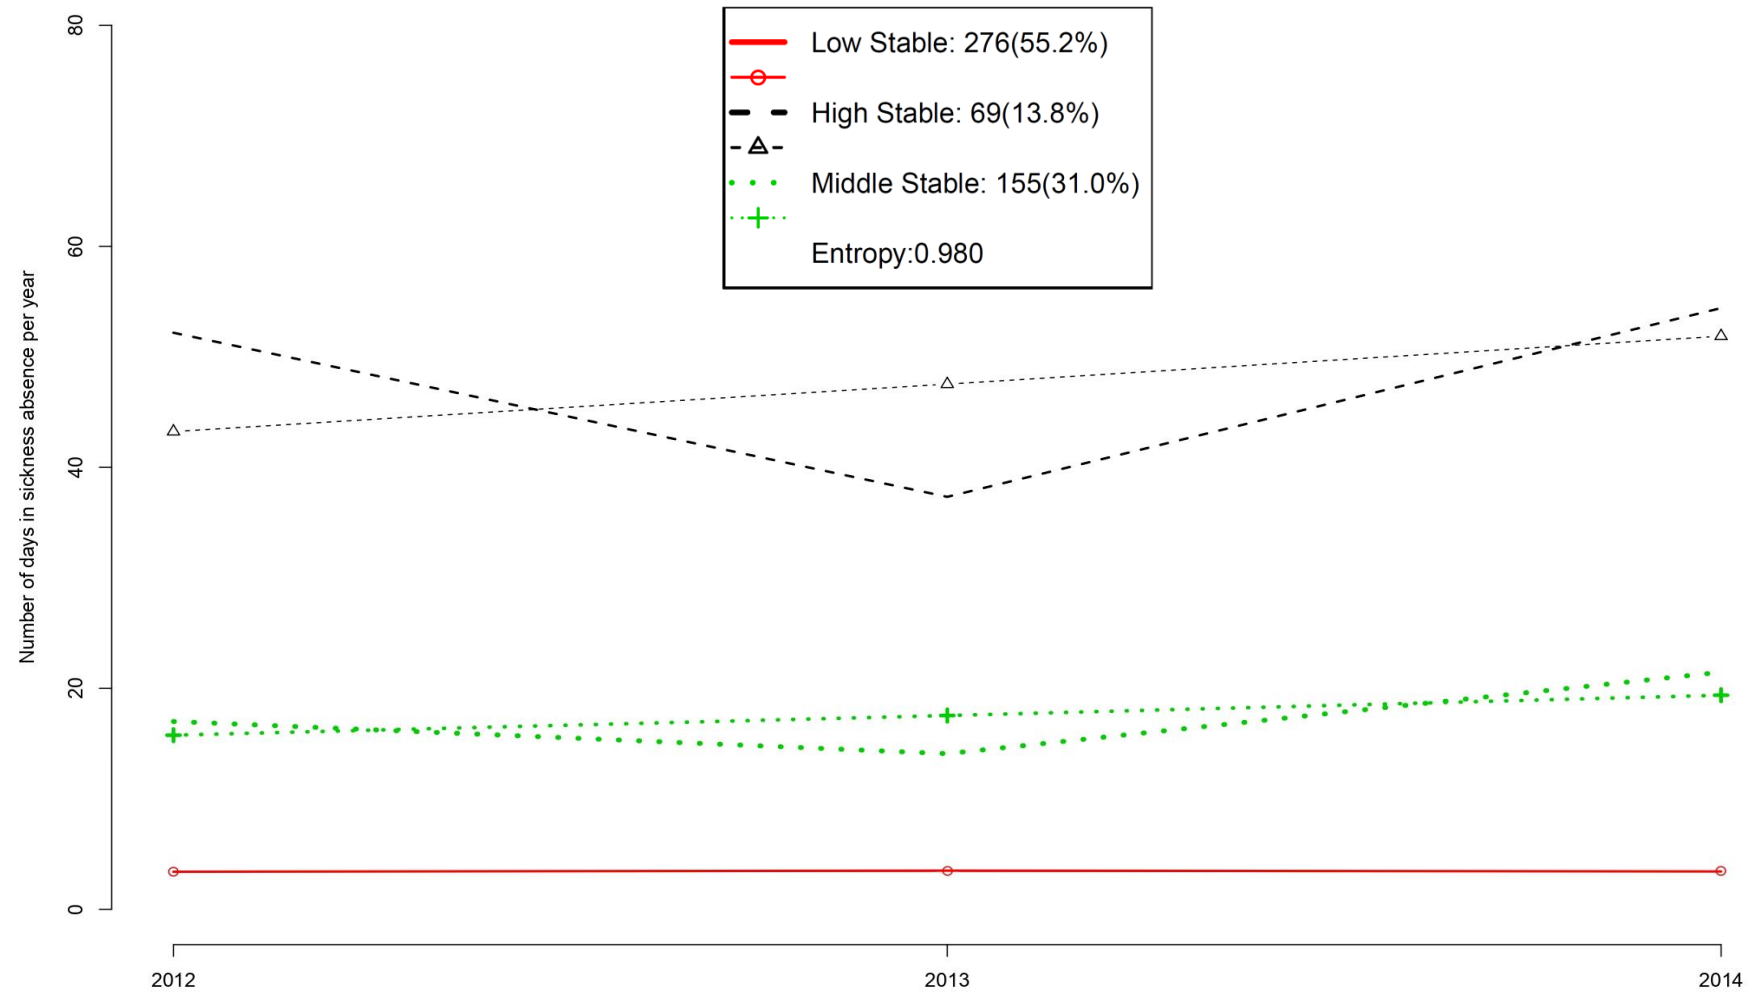

Supplement: bmjopen-2020-040480supp001.pdf [file bmjopen-2020-040480supp001.pdf]
